# Supplementary material for: In-Vitro Cytotoxicity Study: Cell Viability and Cell Morphology of Carbon Nanofibrous Scaffold/Hydroxyapatite Nanocomposites
Source: MDPI journal article supplement (doi:10.3390/molecules26061552), 2021-03-11
Supplement: s1 [file s1]

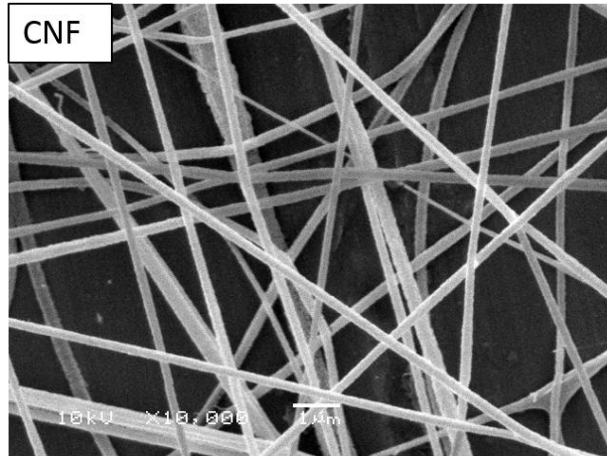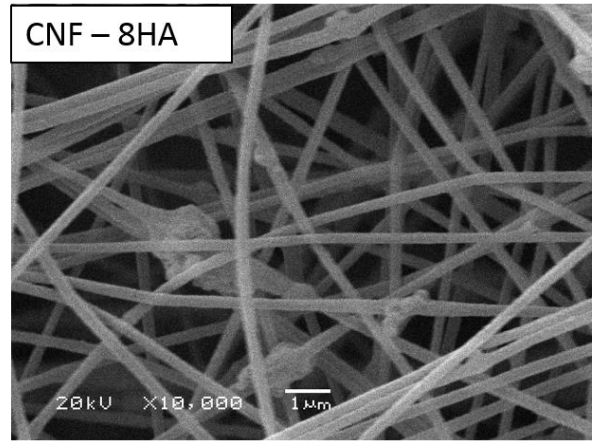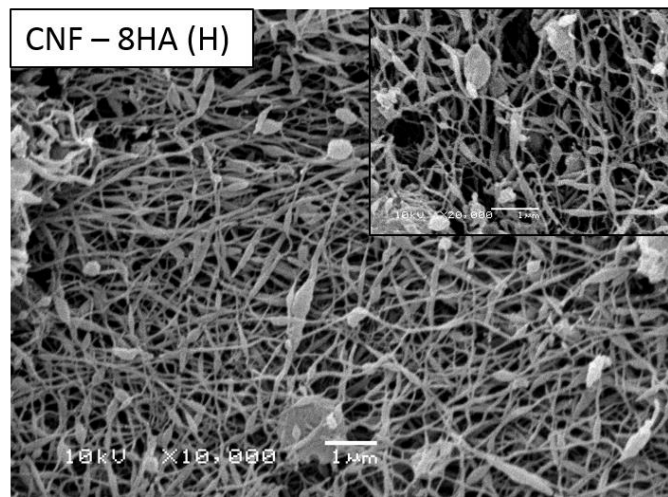

**Figure S1.** SEM images of the prepared samples, and the (CNF-8HA (H)) has high magnified image on the top right of the low magnified image (20000x).
